# Supplementary material for: The role of ARL4C in predicting prognosis and immunotherapy drug susceptibility in pan-cancer analysis
Source: Frontiers journal article supplement (doi:10.3389/fphar.2023.1288492), 2023-12-20
Supplement: Image_1.PDF [file Image_1.PDF]

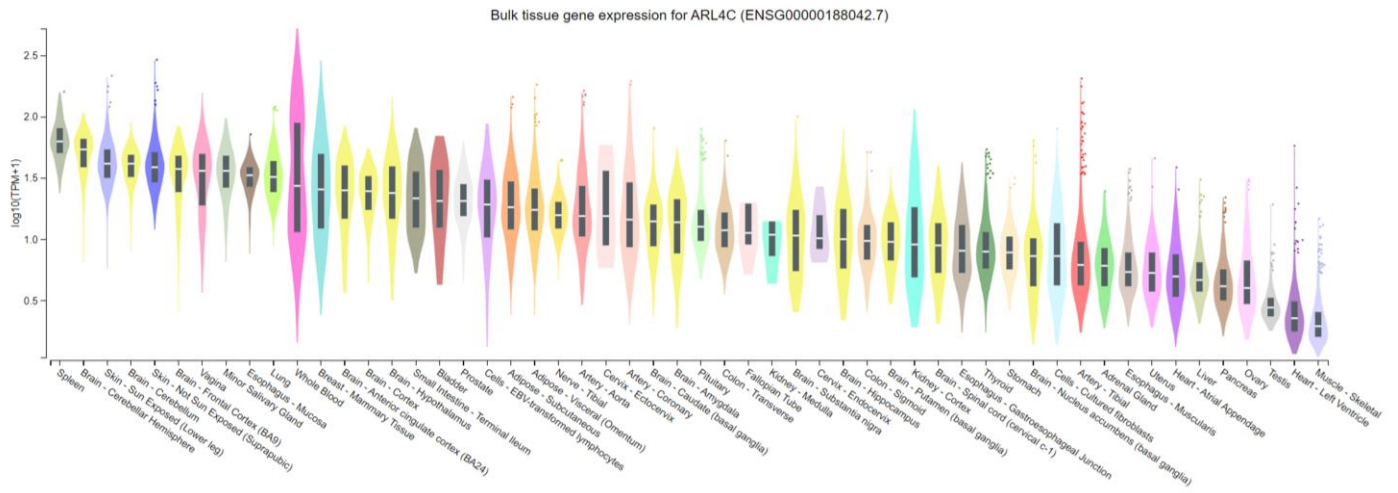

**Supplementary Figure 1.** Expression of ARL4C mRNA in normal tissues.
