# Supplementary material for: The role of ARL4C in predicting prognosis and immunotherapy drug susceptibility in pan-cancer analysis
Source: Frontiers journal article supplement (doi:10.3389/fphar.2023.1288492), 2023-12-20
Supplement: Image_2.PDF [file Image_2.PDF]

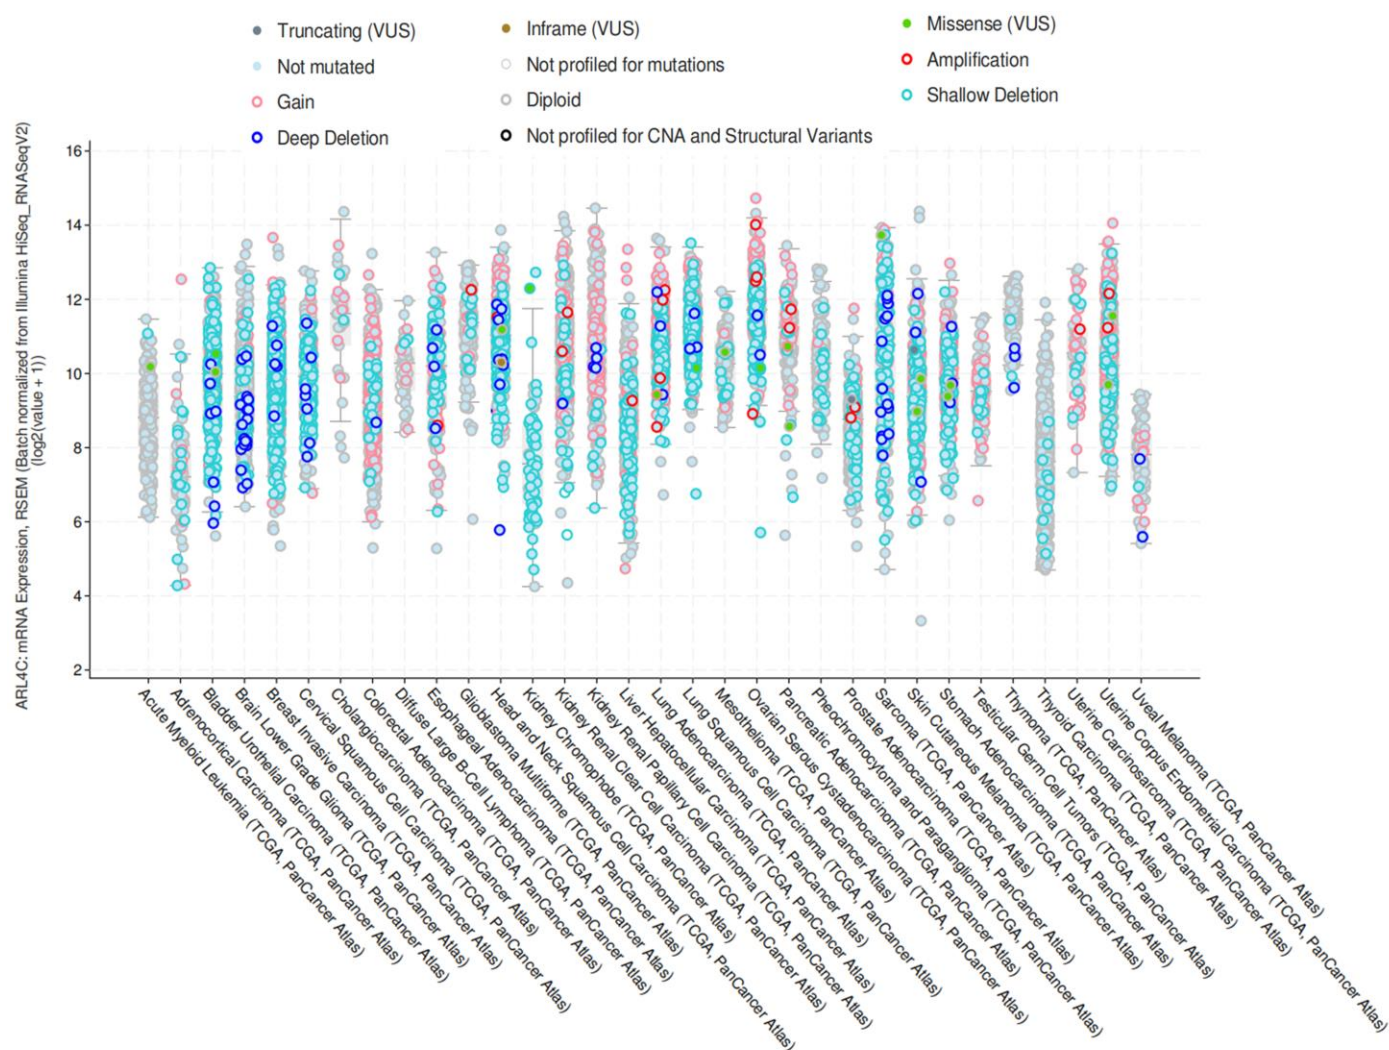

**Supplementary Figure 2.** Mutation counts of ARL4C in cancer.
