# Supplementary material for: The role of ARL4C in predicting prognosis and immunotherapy drug susceptibility in pan-cancer analysis
Source: Frontiers journal article supplement (doi:10.3389/fphar.2023.1288492), 2023-12-20
Supplement: Image_5.PDF [file Image_5.PDF]

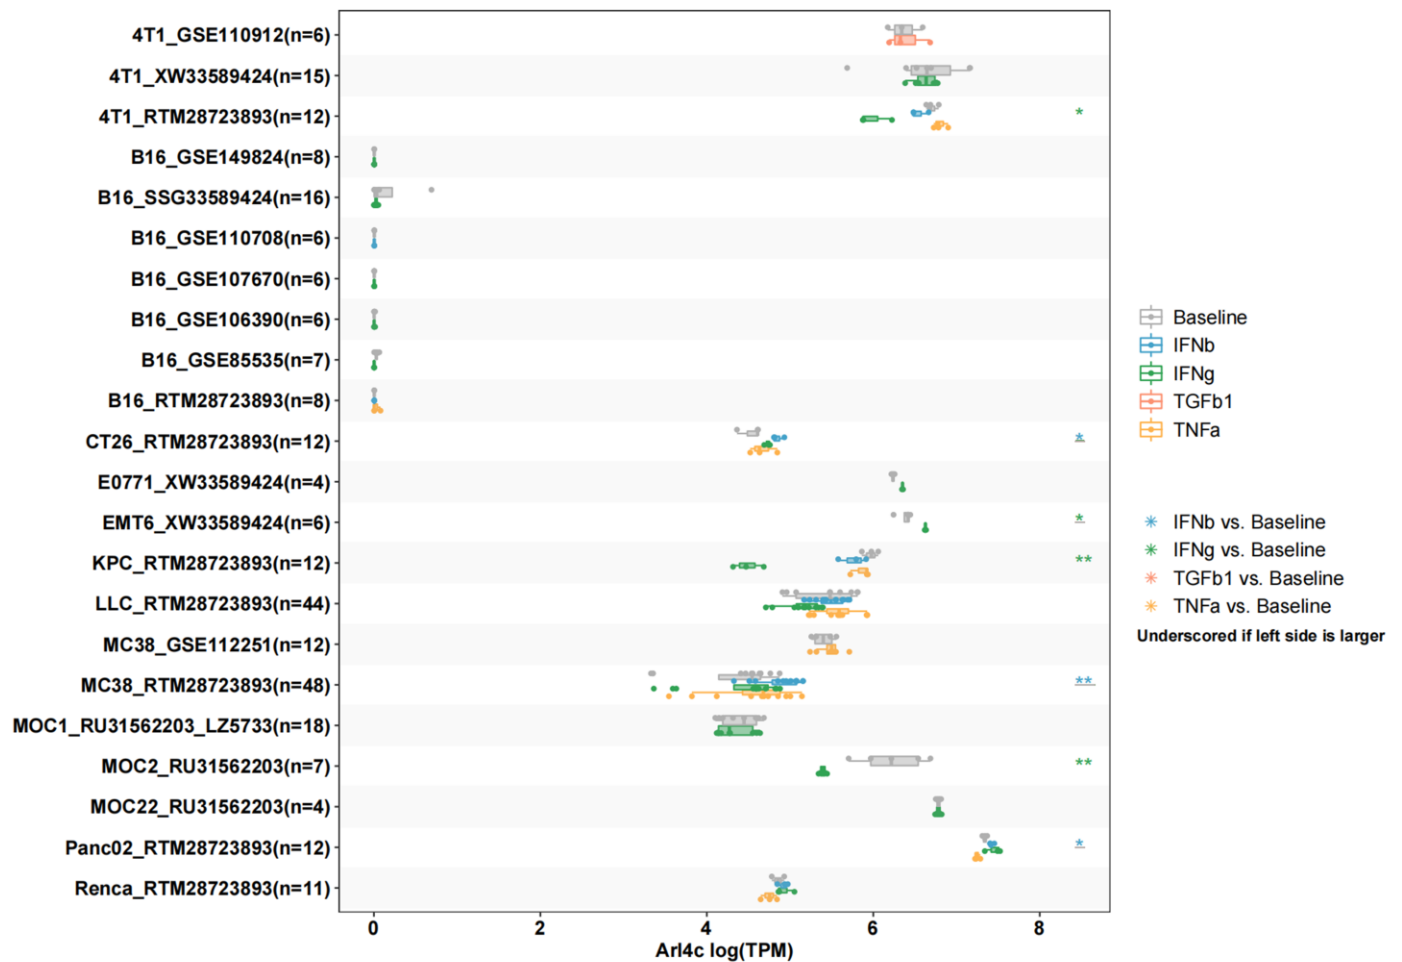

**Supplementary Figure 5.** In vitro experiments to explore the expression level of ARL4C in four cytokine-treated tumor cell lines including IFN $\beta$ , IFN $\gamma$ , TGF $\beta$ , and TNF $\alpha$ .
