# Supplementary material for: The role of ARL4C in predicting prognosis and immunotherapy drug susceptibility in pan-cancer analysis
Source: Front Pharmacol. 2023 Dec 20;14:1288492. doi: 10.3389/fphar.2023.1288492 (PMC10765536; doi:10.3389/fphar.2023.1288492)
Supplement: Supplementary file 1 [file Table2.XLSX]

## Sheet: Sheet1
DATASET	CANCER TYPE	SUBTYPE	ENDPOINT	COHORT	CONTRIBUTOR	ARRAY TYPE	PROBE ID	N	CUTPOINT	MINIMUM P-VALUE	CORRECTED P-VALUE	ln(HRhigh / HRlow)	COX P-VALUE	ln(HR)	HR [95% CIlow - CIupp]
GSE5287	Bladder cancer		Overall Survival	Aarhus (1995-2004)	Als	HG-U133A	202206_at	30	0.73	0.000671	0.0182	1.52	0.15639	0.49	1.64 [0.83 - 3.25]
GSE5287	Bladder cancer		Overall Survival	Aarhus (1995-2004)	Als	HG-U133A	202208_s_at	30	0.77	0.202847	-	-0.64	0.967048	-0.01	0.99 [0.53 - 1.83]
GSE5287	Bladder cancer		Overall Survival	Aarhus (1995-2004)	Als	HG-U133A	213759_at	30	0.13	0.020529	0.272922	2.03	0.570409	0.52	1.69 [0.28 - 10.35]
GSE13507	Bladder cancer		Overall Survival	CNUH	Kim	Human-6 v2	ILMN_1768391	165	0.9	0.096537	-	0.59	0.339128	0.3	1.35 [0.73 - 2.50]
GSE13507	Bladder cancer	Transitional cell carcinoma	Disease Specific Survival	CNUH	Kim	Human-6 v2	ILMN_1768391	165	0.76	0.087995	-	0.63	0.184716	0.53	1.70 [0.78 - 3.75]
GSE12417-GPL96	Blood cancer	AML	Overall Survival	AMLCG (1999-2003)	Metzeler	HG-U133A	202206_at	163	0.28	0.143266	-	0.33	0.620106	0.05	1.05 [0.87 - 1.26]
GSE12417-GPL96	Blood cancer	AML	Overall Survival	AMLCG (1999-2003)	Metzeler	HG-U133A	202208_s_at	163	0.89	0.116869	-	0.44	0.558042	0.07	1.08 [0.84 - 1.38]
GSE12417-GPL96	Blood cancer	AML	Overall Survival	AMLCG (1999-2003)	Metzeler	HG-U133A	213759_at	163	0.8	0.084743	-	0.4	0.871797	0.11	1.12 [0.30 - 4.19]
GSE12417-GPL570	Blood cancer	AML	Overall Survival	AMLCG (2004)	Metzeler	HG-U133_Plus_2	202206_at	79	0.62	0.034182	0.386295	-0.67	0.436417	-0.1	0.91 [0.71 - 1.16]
GSE12417-GPL570	Blood cancer	AML	Overall Survival	AMLCG (2004)	Metzeler	HG-U133_Plus_2	202208_s_at	79	0.35	0.059488	-	-0.56	0.725471	-0.06	0.94 [0.68 - 1.31]
GSE12417-GPL570	Blood cancer	AML	Overall Survival	AMLCG (2004)	Metzeler	HG-U133_Plus_2	213759_at	79	0.28	0.020637	0.273937	-0.69	0.10692	-1.36	0.26 [0.05 - 1.34]
GSE5122	Blood cancer	AML	Overall Survival	San Diego	Raponi	HG-U133A	202206_at	58	0.59	0.000407	0.011889	-1.01	0.027444	-0.27	0.77 [0.60 - 0.97]
GSE5122	Blood cancer	AML	Overall Survival	San Diego	Raponi	HG-U133A	202208_s_at	58	0.66	0.000348	0.010394	-1.11	0.001561	-0.39	0.68 [0.53 - 0.86]
GSE5122	Blood cancer	AML	Overall Survival	San Diego	Raponi	HG-U133A	213759_at	58	0.43	0.044618	0.458244	-0.56	0.209807	-0.16	0.85 [0.66 - 1.10]
GSE8970	Blood cancer	AML	Overall Survival	San Diego	Raponi	HG-U133A	202206_at	34	0.5	0.285237	-	-0.41	0.914507	0.03	1.03 [0.64 - 1.63]
GSE8970	Blood cancer	AML	Overall Survival	San Diego	Raponi	HG-U133A	202208_s_at	34	0.85	0.005455	0.101345	-2.38	0.303997	-0.16	0.85 [0.63 - 1.16]
GSE8970	Blood cancer	AML	Overall Survival	San Diego	Raponi	HG-U133A	213759_at	34	0.65	0.016799	0.236621	-1.05	0.046898	-0.68	0.51 [0.26 - 0.99]
GSE4475	Blood cancer	B-cell lymphoma	Overall Survival	Berlin (2003-2005)	Hummel	HG-U133A	202206_at	158	0.2	0.004105	0.080977	-0.74	0.112165	-0.44	0.64 [0.37 - 1.11]
GSE4475	Blood cancer	B-cell lymphoma	Overall Survival	Berlin (2003-2005)	Hummel	HG-U133A	202208_s_at	158	0.16	0.017039	0.239041	0.98	0.824735	-0.07	0.94 [0.52 - 1.67]
GSE4475	Blood cancer	B-cell lymphoma	Overall Survival	Berlin (2003-2005)	Hummel	HG-U133A	213759_at	158	0.87	0.136534	-	-0.62	0.728535	0.35	1.42 [0.19 - 10.45]
E-TABM-346	Blood cancer	DLBCL	Event Free Survival	GELA (1998-2000)	Jais	HG-U133A	202206_at	53	0.13	0.088655	-	1.18	0.69734	0.14	1.15 [0.56 - 2.37]
E-TABM-346	Blood cancer	DLBCL	Overall Survival	GELA (1998-2000)	Jais	HG-U133A	202206_at	53	0.13	0.186094	-	0.93	0.704356	0.15	1.16 [0.53 - 2.53]
E-TABM-346	Blood cancer	DLBCL	Event Free Survival	GELA (1998-2000)	Jais	HG-U133A	202208_s_at	53	0.11	0.065512	-	-0.87	0.830805	0.07	1.07 [0.56 - 2.04]
E-TABM-346	Blood cancer	DLBCL	Overall Survival	GELA (1998-2000)	Jais	HG-U133A	202208_s_at	53	0.11	0.034359	0.387604	-1.01	0.921322	0.03	1.04 [0.52 - 2.07]
E-TABM-346	Blood cancer	DLBCL	Event Free Survival	GELA (1998-2000)	Jais	HG-U133A	213759_at	53	0.21	0.039755	0.426007	-0.79	0.780816	-0.06	0.94 [0.60 - 1.47]
E-TABM-346	Blood cancer	DLBCL	Overall Survival	GELA (1998-2000)	Jais	HG-U133A	213759_at	53	0.21	0.139247	-	-0.61	0.858872	-0.04	0.96 [0.60 - 1.53]
GSE16131-GPL96	Blood cancer	Follicular lymphoma	Overall Survival	NCI (1974-2001)	Dave	HG-U133A	202206_at	180	0.11	0.015369	0.221889	-0.72	0.442327	-0.13	0.88 [0.63 - 1.22]
GSE16131-GPL96	Blood cancer	Follicular lymphoma	Overall Survival	NCI (1974-2001)	Dave	HG-U133A	202208_s_at	180	0.11	0.141209	-	-0.44	0.509307	-0.13	0.88 [0.59 - 1.30]
GSE16131-GPL96	Blood cancer	Follicular lymphoma	Overall Survival	NCI (1974-2001)	Dave	HG-U133A	213759_at	180	0.51	0.017912	0.247755	0.49	0.18892	0.15	1.16 [0.93 - 1.45]
GSE2658	Blood cancer	Multiple myeloma	Disease Specific Survival	Arkansas	Zhan	HG-U133_Plus_2	202206_at	559	0.68	0.010154	0.163329	0.52	0.309941	0.08	1.09 [0.93 - 1.27]
GSE2658	Blood cancer	Multiple myeloma	Disease Specific Survival	Arkansas	Zhan	HG-U133_Plus_2	202208_s_at	559	0.64	0.011467	0.178884	0.51	0.18295	0.12	1.13 [0.95 - 1.34]
GSE2658	Blood cancer	Multiple myeloma	Disease Specific Survival	Arkansas	Zhan	HG-U133_Plus_2	213759_at	559	0.1	0.000817	0.021495	-0.85	0.143783	-0.19	0.82 [0.63 - 1.07]
GSE4271-GPL96	Brain cancer	Astrocytoma	Overall Survival	MDA	Phillips	HG-U133A	202206_at	77	0.68	0.000165	0.005444	1.03	0.001142	0.65	1.91 [1.29 - 2.82]
GSE4271-GPL96	Brain cancer	Astrocytoma	Overall Survival	MDA	Phillips	HG-U133A	202208_s_at	77	0.34	0.000195	0.006293	1.07	0.002946	0.39	1.48 [1.14 - 1.92]
GSE4271-GPL96	Brain cancer	Astrocytoma	Overall Survival	MDA	Phillips	HG-U133A	213759_at	77	0.13	0.158649	-	0.6	0.633501	0.07	1.07 [0.80 - 1.44]
GSE7696	Brain cancer	Glioblastoma	Overall Survival	Lausanne	Murat	HG-U133_Plus_2	202206_at	70	0.13	0.166933	-	0.56	0.503206	0.11	1.11 [0.81 - 1.52]
GSE7696	Brain cancer	Glioblastoma	Overall Survival	Lausanne	Murat	HG-U133_Plus_2	202208_s_at	70	0.86	0.014877	0.216695	0.85	0.360383	0.18	1.20 [0.82 - 1.75]
GSE7696	Brain cancer	Glioblastoma	Overall Survival	Lausanne	Murat	HG-U133_Plus_2	213759_at	70	0.21	0.08012	-	-0.54	0.631247	0.42	1.53 [0.27 - 8.59]
MGH-glioma	Brain cancer	Glioma	Overall Survival	CBTTB, MGH, BWH, CH	Nutt	HG-U95A	39828_at	50	0.88	0.115828	-	-0.84	0.275993	-1.63	0.20 [0.01 - 3.67]
MGH-glioma	Brain cancer	Glioma	Overall Survival	CBTTB, MGH, BWH, CH	Nutt	HG-U95A	39829_at	50	0.48	4.7e-05	0.001789	1.53	0.000389	0.43	1.54 [1.21 - 1.96]
GSE4412-GPL96	Brain cancer	Glioma	Overall Survival	UCLA (1996-2003)	Freije	HG-U133A	202206_at	74	0.41	0.052688	-	0.58	0.158102	0.29	1.34 [0.89 - 2.02]
GSE4412-GPL96	Brain cancer	Glioma	Overall Survival	UCLA (1996-2003)	Freije	HG-U133A	202208_s_at	74	0.23	0.001523	0.036187	1.26	0.002053	0.49	1.63 [1.19 - 2.21]
GSE4412-GPL96	Brain cancer	Glioma	Overall Survival	UCLA (1996-2003)	Freije	HG-U133A	213759_at	74	0.72	0.02698	0.329776	0.67	0.100313	0.33	1.39 [0.94 - 2.05]
GSE16581	Brain cancer	Meningioma	Overall Survival	UCLA	Lee	HG-U133_Plus_2	202206_at	67	0.88	0.000775	0.020568	2.2	0.062626	0.86	2.36 [0.96 - 5.81]
GSE16581	Brain cancer	Meningioma	Overall Survival	UCLA	Lee	HG-U133_Plus_2	202208_s_at	67	0.84	0.007129	0.12476	1.88	0.053479	1.07	2.91 [0.98 - 8.58]
GSE16581	Brain cancer	Meningioma	Overall Survival	UCLA	Lee	HG-U133_Plus_2	213759_at	67	0.64	0.16794	-	-1.36	0.83338	0.55	1.73 [0.01 - 284.57]
GSE19615	Breast cancer		Distant Metastasis Free Survival	DF/HCC	Li	HG-U133_Plus_2	202206_at	115	0.86	0.000775	0.020569	1.63	0.049023	1.11	3.03 [1.00 - 9.14]
GSE19615	Breast cancer		Distant Metastasis Free Survival	DF/HCC	Li	HG-U133_Plus_2	202208_s_at	115	0.74	0.032305	0.372168	1.09	0.417704	0.43	1.53 [0.55 - 4.30]
GSE19615	Breast cancer		Distant Metastasis Free Survival	DF/HCC	Li	HG-U133_Plus_2	213759_at	115	0.7	0.000314	0.009496	1.85	0.098846	0.81	2.25 [0.86 - 5.90]
GSE3143	Breast cancer		Overall Survival	Duke	Bild	HG-U95A	39828_at	158	0.86	0.015247	0.220606	0.81	0.140674	0.37	1.45 [0.89 - 2.36]
GSE3143	Breast cancer		Overall Survival	Duke	Bild	HG-U95A	39829_at	158	0.33	0.033063	0.377918	0.71	0.250809	0.3	1.35 [0.81 - 2.26]
GSE7849	Breast cancer		Disease Free Survival	Duke (1990-2001)	Anders	HG-U95A	39828_at	76	0.12	0.001696	0.039545	-1.57	0.505653	-0.38	0.69 [0.23 - 2.08]
GSE7849	Breast cancer		Disease Free Survival	Duke (1990-2001)	Anders	HG-U95A	39829_at	76	0.84	0.13991	-	0.84	0.765682	0.11	1.11 [0.55 - 2.26]
GSE12276	Breast cancer		Relapse Free Survival	EMC	Bos	HG-U133_Plus_2	202206_at	204	0.72	0.003358	0.068974	0.47	0.021505	0.28	1.32 [1.04 - 1.68]
GSE12276	Breast cancer		Relapse Free Survival	EMC	Bos	HG-U133_Plus_2	202208_s_at	204	0.85	0.001571	0.037138	0.64	0.058253	0.26	1.29 [0.99 - 1.69]
GSE12276	Breast cancer		Relapse Free Survival	EMC	Bos	HG-U133_Plus_2	213759_at	204	0.56	0.274043	-	-0.16	0.795013	-0.02	0.98 [0.83 - 1.15]
GSE6532-GPL570	Breast cancer		Relapse Free Survival	GUYT	Loi	HG-U133_Plus_2	202206_at	87	0.31	0.156618	-	0.64	0.459031	0.16	1.17 [0.77 - 1.77]
GSE6532-GPL570	Breast cancer		Distant Metastasis Free Survival	GUYT	Loi	HG-U133_Plus_2	202206_at	87	0.31	0.156618	-	0.64	0.459031	0.16	1.17 [0.77 - 1.77]
GSE6532-GPL570	Breast cancer		Relapse Free Survival	GUYT	Loi	HG-U133_Plus_2	202208_s_at	87	0.9	0.018734	0.255816	1.12	0.290267	0.37	1.44 [0.73 - 2.83]
GSE6532-GPL570	Breast cancer		Distant Metastasis Free Survival	GUYT	Loi	HG-U133_Plus_2	202208_s_at	87	0.9	0.018734	0.255816	1.12	0.290267	0.37	1.44 [0.73 - 2.83]
GSE6532-GPL570	Breast cancer		Relapse Free Survival	GUYT	Loi	HG-U133_Plus_2	213759_at	87	0.15	0.0598	-	1.7	0.330861	0.93	2.53 [0.39 - 16.48]
GSE6532-GPL570	Breast cancer		Distant Metastasis Free Survival	GUYT	Loi	HG-U133_Plus_2	213759_at	87	0.15	0.0598	-	1.7	0.330861	0.93	2.53 [0.39 - 16.48]
GSE9195	Breast cancer		Relapse Free Survival	GUYT2	Loi	HG-U133_Plus_2	202206_at	77	0.65	0.036623	0.404072	1.13	0.09309	0.71	2.03 [0.89 - 4.64]
GSE9195	Breast cancer		Distant Metastasis Free Survival	GUYT2	Loi	HG-U133_Plus_2	202206_at	77	0.65	0.012937	0.195617	1.56	0.027921	1.05	2.86 [1.12 - 7.28]
GSE9195	Breast cancer		Relapse Free Survival	GUYT2	Loi	HG-U133_Plus_2	202208_s_at	77	0.88	0.000114	0.003934	1.91	0.013361	1.44	4.23 [1.35 - 13.25]
GSE9195	Breast cancer		Distant Metastasis Free Survival	GUYT2	Loi	HG-U133_Plus_2	202208_s_at	77	0.88	0.001166	0.028981	1.84	0.029053	1.45	4.28 [1.16 - 15.76]
GSE9195	Breast cancer		Relapse Free Survival	GUYT2	Loi	HG-U133_Plus_2	213759_at	77	0.38	0.002215	0.049246	15.92	0.07071	2.23	9.34 [0.83 - 105.32]
GSE9195	Breast cancer		Distant Metastasis Free Survival	GUYT2	Loi	HG-U133_Plus_2	213759_at	77	0.38	0.007922	0.135285	15.9	0.248282	1.7	5.45 [0.31 - 97.08]
GSE12093	Breast cancer		Distant Metastasis Free Survival	IO, NCI, TUM, CCF (1992-2000)	Zhang	HG-U133A	202206_at	136	0.5	0.110551	-	-0.74	0.594213	-0.18	0.84 [0.44 - 1.61]
GSE12093	Breast cancer		Distant Metastasis Free Survival	IO, NCI, TUM, CCF (1992-2000)	Zhang	HG-U133A	202208_s_at	136	0.13	0.083172	-	-0.88	0.572598	-0.17	0.84 [0.46 - 1.54]
GSE12093	Breast cancer		Distant Metastasis Free Survival	IO, NCI, TUM, CCF (1992-2000)	Zhang	HG-U133A	213759_at	136	0.54	0.028028	0.338406	1.02	0.581955	0.15	1.16 [0.68 - 1.99]
GSE11121	Breast cancer		Distant Metastasis Free Survival	Mainz (1988-1998)	Schmidt	HG-U133A	202206_at	200	0.39	0.068389	-	-0.53	0.345255	-0.25	0.78 [0.46 - 1.31]
GSE11121	Breast cancer		Distant Metastasis Free Survival	Mainz (1988-1998)	Schmidt	HG-U133A	202208_s_at	200	0.9	0.169144	-	0.56	0.366078	0.24	1.27 [0.76 - 2.13]
GSE11121	Breast cancer		Distant Metastasis Free Survival	Mainz (1988-1998)	Schmidt	HG-U133A	213759_at	200	0.23	0.047794	0.478217	0.91	0.908214	-0.02	0.98 [0.67 - 1.43]
GSE1378	Breast cancer		Relapse Free Survival	MGH (1987-2000)	Ma	Arcturus 22k	1637	60	0.5	0.005354	0.099869	1.09	0.074867	0.29	1.33 [0.97 - 1.83]
GSE1379	Breast cancer		Relapse Free Survival	MGH (1987-2000)	Ma	Arcturus 22k	1637	60	0.2	0.019327	0.261535	1.57	0.344384	0.38	1.46 [0.67 - 3.19]
GSE2034	Breast cancer		Distant Metastasis Free Survival	Rotterdam (1980-1995)	Wang	HG-U133A	202206_at	286	0.13	0.26557	-	0.35	0.986602	0	1.00 [0.72 - 1.39]
GSE2034	Breast cancer		Distant Metastasis Free Survival	Rotterdam (1980-1995)	Wang	HG-U133A	202208_s_at	286	0.11	0.034962	0.392042	0.86	0.52005	0.1	1.11 [0.81 - 1.51]
GSE2034	Breast cancer		Distant Metastasis Free Survival	Rotterdam (1980-1995)	Wang	HG-U133A	213759_at	286	0.58	0.024108	0.305291	-0.46	0.274396	-0.15	0.86 [0.65 - 1.13]
GSE1456-GPL96	Breast cancer		Overall Survival	Stockholm (1994-1996)	Pawitan	HG-U133A	202206_at	159	0.44	0.054256	-	-0.61	0.36952	-0.31	0.74 [0.38 - 1.44]
GSE1456-GPL96	Breast cancer		Relapse Free Survival	Stockholm (1994-1996)	Pawitan	HG-U133A	202206_at	159	0.43	0.009992	0.161359	-0.81	0.720901	-0.12	0.88 [0.45 - 1.74]
GSE1456-GPL96	Breast cancer		Disease Specific Survival	Stockholm (1994-1996)	Pawitan	HG-U133A	202206_at	159	0.39	0.117109	-	-0.57	0.600637	-0.21	0.81 [0.37 - 1.79]
GSE1456-GPL96	Breast cancer		Overall Survival	Stockholm (1994-1996)	Pawitan	HG-U133A	202208_s_at	159	0.1	0.000649	0.0177	-1.18	0.018444	-0.72	0.49 [0.27 - 0.89]
GSE1456-GPL96	Breast cancer		Relapse Free Survival	Stockholm (1994-1996)	Pawitan	HG-U133A	202208_s_at	159	0.16	0.04236	0.44353	-0.7	0.958791	0.02	1.02 [0.54 - 1.92]
GSE1456-GPL96	Breast cancer		Disease Specific Survival	Stockholm (1994-1996)	Pawitan	HG-U133A	202208_s_at	159	0.1	0.139219	-	-0.71	0.66494	-0.17	0.84 [0.38 - 1.84]
GSE1456-GPL96	Breast cancer		Overall Survival	Stockholm (1994-1996)	Pawitan	HG-U133A	213759_at	159	0.86	0.166781	-	-0.81	0.702039	-0.08	0.92 [0.61 - 1.40]
GSE1456-GPL96	Breast cancer		Relapse Free Survival	Stockholm (1994-1996)	Pawitan	HG-U133A	213759_at	159	0.64	0.157282	-	-0.5	0.419362	-0.17	0.84 [0.55 - 1.28]
GSE1456-GPL96	Breast cancer		Disease Specific Survival	Stockholm (1994-1996)	Pawitan	HG-U133A	213759_at	159	0.34	0.158065	-	-0.52	0.529714	-0.16	0.85 [0.52 - 1.40]
GSE7378	Breast cancer		Disease Free Survival	UCSF	Zhou	U133AAofAv2	202206_at	54	0.2	0.274516	-	-0.78	0.989306	0.01	1.01 [0.38 - 2.68]
GSE7378	Breast cancer		Disease Free Survival	UCSF	Zhou	U133AAofAv2	202207_at	54	0.85	0.181155	-	0.93	0.820939	-0.09	0.91 [0.42 - 1.99]
GSE7378	Breast cancer		Disease Free Survival	UCSF	Zhou	U133AAofAv2	202208_s_at	54	0.7	0.167606	-	-1.41	0.508866	-0.42	0.66 [0.19 - 2.29]
GSE7378	Breast cancer		Disease Free Survival	UCSF	Zhou	U133AAofAv2	213759_at	54	0.83	0.171438	-	-15.35	0.268017	-2.61	0.07 [0.00 - 7.44]
E-TABM-158	Breast cancer		Distant Metastasis Free Survival	UCSF, CPMC (1989-1997)	Chin	HG-U133A	202206_at	117	0.14	0.048523	0.482685	-0.9	0.152852	-0.36	0.69 [0.42 - 1.14]
E-TABM-158	Breast cancer		Relapse Free Survival	UCSF, CPMC (1989-1997)	Chin	HG-U133A	202206_at	117	0.65	0.273686	-	-0.38	0.603309	-0.1	0.90 [0.61 - 1.33]
E-TABM-158	Breast cancer		Overall Survival	UCSF, CPMC (1989-1997)	Chin	HG-U133A	202206_at	117	0.65	0.273686	-	-0.38	0.603309	-0.1	0.90 [0.61 - 1.33]
E-TABM-158	Breast cancer		Disease Specific Survival	UCSF, CPMC (1989-1997)	Chin	HG-U133A	202206_at	117	0.14	0.062624	-	-0.79	0.227212	-0.29	0.75 [0.46 - 1.20]
E-TABM-158	Breast cancer		Distant Metastasis Free Survival	UCSF, CPMC (1989-1997)	Chin	HG-U133A	202208_s_at	117	0.22	0.037603	0.411039	-0.84	0.145648	-0.44	0.64 [0.36 - 1.16]
E-TABM-158	Breast cancer		Relapse Free Survival	UCSF, CPMC (1989-1997)	Chin	HG-U133A	202208_s_at	117	0.38	0.301323	-	0.36	0.575376	-0.13	0.88 [0.56 - 1.38]
E-TABM-158	Breast cancer		Overall Survival	UCSF, CPMC (1989-1997)	Chin	HG-U133A	202208_s_at	117	0.38	0.301323	-	0.36	0.575376	-0.13	0.88 [0.56 - 1.38]
E-TABM-158	Breast cancer		Disease Specific Survival	UCSF, CPMC (1989-1997)	Chin	HG-U133A	202208_s_at	117	0.67	0.028722	0.344048	-1.03	0.093165	-0.47	0.62 [0.36 - 1.08]
E-TABM-158	Breast cancer		Distant Metastasis Free Survival	UCSF, CPMC (1989-1997)	Chin	HG-U133A	213759_at	117	0.79	0.182173	-	0.56	0.862057	-0.18	0.83 [0.10 - 6.69]
E-TABM-158	Breast cancer		Relapse Free Survival	UCSF, CPMC (1989-1997)	Chin	HG-U133A	213759_at	117	0.54	0.068957	-	-0.59	0.368617	-0.84	0.43 [0.07 - 2.71]
E-TABM-158	Breast cancer		Overall Survival	UCSF, CPMC (1989-1997)	Chin	HG-U133A	213759_at	117	0.54	0.068957	-	-0.59	0.368617	-0.84	0.43 [0.07 - 2.71]
E-TABM-158	Breast cancer		Disease Specific Survival	UCSF, CPMC (1989-1997)	Chin	HG-U133A	213759_at	117	0.18	0.12381	-	-0.63	0.420601	-0.91	0.40 [0.04 - 3.68]
GSE3494-GPL96	Breast cancer		Disease Specific Survival	Uppsala (1987-1989)	Miller	HG-U133A	202206_at	236	0.13	0.129461	-	-0.55	0.367747	-0.23	0.80 [0.49 - 1.30]
GSE3494-GPL96	Breast cancer		Disease Specific Survival	Uppsala (1987-1989)	Miller	HG-U133A	202208_s_at	236	0.11	0.149309	-	-0.55	0.361576	-0.26	0.77 [0.43 - 1.36]
GSE3494-GPL96	Breast cancer		Disease Specific Survival	Uppsala (1987-1989)	Miller	HG-U133A	213759_at	236	0.39	0.000272	0.008397	-0.97	0.662408	-0.1	0.91 [0.59 - 1.40]
GSE4922-GPL96	Breast cancer		Disease Free Survival	Uppsala (1987-1989)	Ivshina	HG-U133A	202206_at	249	0.43	0.021303	0.28011	-0.48	0.246881	-0.23	0.79 [0.54 - 1.17]
GSE4922-GPL96	Breast cancer		Disease Free Survival	Uppsala (1987-1989)	Ivshina	HG-U133A	202208_s_at	249	0.87	0.09932	-	0.47	0.493089	-0.16	0.86 [0.55 - 1.34]
GSE4922-GPL96	Breast cancer		Disease Free Survival	Uppsala (1987-1989)	Ivshina	HG-U133A	213759_at	249	0.38	0.001497	0.035679	-0.66	0.547358	-0.1	0.90 [0.64 - 1.27]
GSE2990	Breast cancer		Distant Metastasis Free Survival	Uppsala, Oxford	Sotiriou	HG-U133A	202206_at	125	0.1	0.052029	-	-0.87	0.233493	-0.37	0.69 [0.38 - 1.27]
GSE2990	Breast cancer		Distant Metastasis Free Survival	Uppsala, Oxford	Sotiriou	HG-U133A	202206_at	54	0.13	0.134849	-	-0.98	0.522073	-0.16	0.85 [0.52 - 1.40]
GSE2990	Breast cancer		Relapse Free Survival	Uppsala, Oxford	Sotiriou	HG-U133A	202206_at	125	0.87	0.255304	-	-0.67	0.637806	-0.11	0.90 [0.58 - 1.40]
GSE2990	Breast cancer		Relapse Free Survival	Uppsala, Oxford	Sotiriou	HG-U133A	202206_at	62	0.66	0.116844	-	-0.84	0.459739	-0.16	0.86 [0.57 - 1.29]
GSE2990	Breast cancer		Distant Metastasis Free Survival	Uppsala, Oxford	Sotiriou	HG-U133A	202208_s_at	125	0.13	0.373384	-	-0.44	0.553397	-0.25	0.78 [0.34 - 1.78]
GSE2990	Breast cancer		Distant Metastasis Free Survival	Uppsala, Oxford	Sotiriou	HG-U133A	202208_s_at	54	0.69	0.18464	-	-0.9	0.722658	-0.08	0.92 [0.59 - 1.44]
GSE2990	Breast cancer		Relapse Free Survival	Uppsala, Oxford	Sotiriou	HG-U133A	202208_s_at	125	0.3	0.124401	-	0.51	0.999163	0	1.00 [0.54 - 1.84]
GSE2990	Breast cancer		Relapse Free Survival	Uppsala, Oxford	Sotiriou	HG-U133A	202208_s_at	62	0.73	0.117271	-	-0.9	0.457976	-0.14	0.87 [0.60 - 1.26]
GSE2990	Breast cancer		Distant Metastasis Free Survival	Uppsala, Oxford	Sotiriou	HG-U133A	213759_at	125	0.78	0.002164	0.048312	-2.54	0.88612	0.06	1.06 [0.47 - 2.39]
GSE2990	Breast cancer		Distant Metastasis Free Survival	Uppsala, Oxford	Sotiriou	HG-U133A	213759_at	54	0.8	0.214479	-	-1.23	0.731205	-0.15	0.86 [0.36 - 2.04]
GSE2990	Breast cancer		Relapse Free Survival	Uppsala, Oxford	Sotiriou	HG-U133A	213759_at	125	0.78	0.02125	0.279623	-0.88	0.653621	-0.15	0.86 [0.46 - 1.63]
GSE2990	Breast cancer		Relapse Free Survival	Uppsala, Oxford	Sotiriou	HG-U133A	213759_at	62	0.87	0.211057	-	-1.22	0.697855	-0.14	0.87 [0.43 - 1.77]
GSE7390	Breast cancer		Relapse Free Survival	Uppsala, Oxford, Stockholm, IGR, GUYT, CRH (1980-1998)	Desmedt	HG-U133A	202206_at	198	0.31	0.010575	0.168386	0.65	0.227309	0.16	1.17 [0.91 - 1.51]
GSE7390	Breast cancer		Distant Metastasis Free Survival	Uppsala, Oxford, Stockholm, IGR, GUYT, CRH (1980-1998)	Desmedt	HG-U133A	202206_at	198	0.34	0.008322	0.140485	0.82	0.218987	0.2	1.22 [0.89 - 1.67]
GSE7390	Breast cancer		Overall Survival	Uppsala, Oxford, Stockholm, IGR, GUYT, CRH (1980-1998)	Desmedt	HG-U133A	202206_at	198	0.34	0.029116	0.347216	0.7	0.454453	0.12	1.13 [0.82 - 1.57]
GSE7390	Breast cancer		Relapse Free Survival	Uppsala, Oxford, Stockholm, IGR, GUYT, CRH (1980-1998)	Desmedt	HG-U133A	202208_s_at	198	0.21	0.157738	-	0.4	0.276512	0.13	1.13 [0.90 - 1.42]
GSE7390	Breast cancer		Distant Metastasis Free Survival	Uppsala, Oxford, Stockholm, IGR, GUYT, CRH (1980-1998)	Desmedt	HG-U133A	202208_s_at	198	0.54	0.028076	0.3388	0.56	0.328219	0.14	1.15 [0.87 - 1.53]
GSE7390	Breast cancer		Overall Survival	Uppsala, Oxford, Stockholm, IGR, GUYT, CRH (1980-1998)	Desmedt	HG-U133A	202208_s_at	198	0.4	0.124213	-	0.44	0.507989	0.1	1.10 [0.83 - 1.47]
GSE7390	Breast cancer		Relapse Free Survival	Uppsala, Oxford, Stockholm, IGR, GUYT, CRH (1980-1998)	Desmedt	HG-U133A	213759_at	198	0.85	0.204838	-	-0.42	0.697798	-0.03	0.97 [0.81 - 1.15]
GSE7390	Breast cancer		Distant Metastasis Free Survival	Uppsala, Oxford, Stockholm, IGR, GUYT, CRH (1980-1998)	Desmedt	HG-U133A	213759_at	198	0.62	0.145753	-	-0.39	0.835063	0.02	1.02 [0.83 - 1.26]
GSE7390	Breast cancer		Overall Survival	Uppsala, Oxford, Stockholm, IGR, GUYT, CRH (1980-1998)	Desmedt	HG-U133A	213759_at	198	0.62	0.056912	-	-0.56	0.628022	-0.06	0.94 [0.75 - 1.19]
GSE12945	Colorectal cancer		Disease Free Survival	Berlin	Staub	HG-U133A	202206_at	51	0.86	0.001051	0.026566	2.39	0.400121	0.64	1.91 [0.42 - 8.55]
GSE12945	Colorectal cancer		Overall Survival	Berlin	Staub	HG-U133A	202206_at	62	0.82	0.00014	0.004714	1.93	0.025074	0.97	2.63 [1.13 - 6.14]
GSE12945	Colorectal cancer		Disease Free Survival	Berlin	Staub	HG-U133A	202208_s_at	51	0.41	0.047045	0.473575	15.99	0.670162	0.51	1.67 [0.16 - 17.51]
GSE12945	Colorectal cancer		Overall Survival	Berlin	Staub	HG-U133A	202208_s_at	62	0.71	0.029218	0.348033	1.2	0.022918	1.3	3.68 [1.20 - 11.28]
GSE12945	Colorectal cancer		Disease Free Survival	Berlin	Staub	HG-U133A	213759_at	51	0.14	0.050207	-	-1.61	0.603567	-1.49	0.23 [0.00 - 62.49]
GSE12945	Colorectal cancer		Overall Survival	Berlin	Staub	HG-U133A	213759_at	62	0.16	0.005663	0.104343	-1.49	0.123396	-2.91	0.05 [0.00 - 2.21]
GSE17536	Colorectal cancer		Disease Free Survival	MCC	Smith	HG-U133_Plus_2	202206_at	145	0.48	0.000137	0.004613	1.47	0.000552	0.62	1.86 [1.31 - 2.65]
GSE17536	Colorectal cancer		Overall Survival	MCC	Smith	HG-U133_Plus_2	202206_at	177	0.41	0.001257	0.030857	0.84	0.046097	0.26	1.30 [1.00 - 1.69]
GSE17536	Colorectal cancer		Disease Specific Survival	MCC	Smith	HG-U133_Plus_2	202206_at	177	0.42	0.000234	0.007361	1.17	0.003497	0.44	1.55 [1.16 - 2.09]
GSE17536	Colorectal cancer		Disease Free Survival	MCC	Smith	HG-U133_Plus_2	202208_s_at	145	0.39	0.000926	0.023887	1.46	0.002009	0.81	2.26 [1.35 - 3.78]
GSE17536	Colorectal cancer		Overall Survival	MCC	Smith	HG-U133_Plus_2	202208_s_at	177	0.46	0.009721	0.158053	0.64	0.053492	0.37	1.45 [0.99 - 2.11]
GSE17536	Colorectal cancer		Disease Specific Survival	MCC	Smith	HG-U133_Plus_2	202208_s_at	177	0.46	0.001869	0.042846	0.93	0.009484	0.57	1.77 [1.15 - 2.72]
GSE17536	Colorectal cancer		Disease Free Survival	MCC	Smith	HG-U133_Plus_2	213759_at	145	0.1	0.236157	-	-0.56	0.803055	-0.3	0.74 [0.07 - 8.07]
GSE17536	Colorectal cancer		Overall Survival	MCC	Smith	HG-U133_Plus_2	213759_at	177	0.25	0.002878	0.060918	-0.73	0.037686	-1.98	0.14 [0.02 - 0.89]
GSE17536	Colorectal cancer		Disease Specific Survival	MCC	Smith	HG-U133_Plus_2	213759_at	177	0.25	0.036048	0.39994	-0.61	0.124776	-1.66	0.19 [0.02 - 1.58]
GSE14333	Colorectal cancer		Disease Free Survival	Melbourne	Jorissen	HG-U133_Plus_2	202206_at	226	0.61	2e-06	0.000101	1.36	8e-06	0.68	1.96 [1.46 - 2.64]
GSE14333	Colorectal cancer		Disease Free Survival	Melbourne	Jorissen	HG-U133_Plus_2	202208_s_at	226	0.7	1.2e-05	0.000546	1.18	0.000354	0.6	1.83 [1.31 - 2.55]
GSE14333	Colorectal cancer		Disease Free Survival	Melbourne	Jorissen	HG-U133_Plus_2	213759_at	226	0.34	0.005531	0.102447	0.98	0.07272	0.21	1.24 [0.98 - 1.56]
GSE17537	Colorectal cancer		Overall Survival	VMC	Smith	HG-U133_Plus_2	202206_at	55	0.64	0.003573	0.072481	1.25	0.016122	0.58	1.78 [1.11 - 2.85]
GSE17537	Colorectal cancer		Disease Free Survival	VMC	Smith	HG-U133_Plus_2	202206_at	55	0.71	0.00707	0.123969	1.3	0.049624	0.52	1.68 [1.00 - 2.81]
GSE17537	Colorectal cancer		Disease Specific Survival	VMC	Smith	HG-U133_Plus_2	202206_at	49	0.88	0.003153	0.06557	1.64	0.175409	0.44	1.55 [0.82 - 2.90]
GSE17537	Colorectal cancer		Overall Survival	VMC	Smith	HG-U133_Plus_2	202208_s_at	55	0.67	0.000167	0.005485	1.58	0.0008	0.91	2.49 [1.46 - 4.25]
GSE17537	Colorectal cancer		Disease Free Survival	VMC	Smith	HG-U133_Plus_2	202208_s_at	55	0.71	3.4e-05	0.001353	1.94	0.000545	1.01	2.75 [1.55 - 4.88]
GSE17537	Colorectal cancer		Disease Specific Survival	VMC	Smith	HG-U133_Plus_2	202208_s_at	49	0.57	0.001992	0.045138	1.82	0.005208	1.02	2.79 [1.36 - 5.71]
GSE17537	Colorectal cancer		Overall Survival	VMC	Smith	HG-U133_Plus_2	213759_at	55	0.78	0.03203	0.370064	0.97	0.186684	1.48	4.40 [0.49 - 39.72]
GSE17537	Colorectal cancer		Disease Free Survival	VMC	Smith	HG-U133_Plus_2	213759_at	55	0.24	0.104245	-	1.12	0.215743	1.52	4.58 [0.41 - 50.86]
GSE17537	Colorectal cancer		Disease Specific Survival	VMC	Smith	HG-U133_Plus_2	213759_at	49	0.86	0.240219	-	0.76	0.511956	0.96	2.61 [0.15 - 46.01]
GSE22138	Eye cancer	Uveal melanoma	Distant Metastasis Free Survival	BRCIC	Laurent	HG-U133_Plus_2	202206_at	63	0.37	0.198182	-	0.48	0.788236	-0.04	0.96 [0.74 - 1.26]
GSE22138	Eye cancer	Uveal melanoma	Distant Metastasis Free Survival	BRCIC	Laurent	HG-U133_Plus_2	202208_s_at	63	0.32	0.007628	0.131423	1.14	0.958348	0.01	1.01 [0.71 - 1.43]
GSE22138	Eye cancer	Uveal melanoma	Distant Metastasis Free Survival	BRCIC	Laurent	HG-U133_Plus_2	213759_at	63	0.29	0.000295	0.008999	-1.19	0.013709	-26.2	0.00 [0.00 - 0.00]
GSE2837	Head and neck cancer	Squamous cell carcinoma	Relapse Free Survival	VUMC, VAMC, UTMDACC (1992-2005)	Chung	U133_X3P	g12654450_3p_a_at	28	0.75	0.148173	-	0.81	0.248045	0.28	1.32 [0.82 - 2.11]
GSE2837	Head and neck cancer	Squamous cell carcinoma	Relapse Free Survival	VUMC, VAMC, UTMDACC (1992-2005)	Chung	U133_X3P	Hs.111554.0.S3_3p_at	28	0.68	0.103979	-	-1.04	0.624175	-1.33	0.26 [0.00 - 54.62]
GSE2837	Head and neck cancer	Squamous cell carcinoma	Relapse Free Survival	VUMC, VAMC, UTMDACC (1992-2005)	Chung	U133_X3P	Hs.111554.1.A1_3p_at	28	0.25	0.046846	0.472336	-1.14	0.65172	-2.53	0.08 [0.00 - 4708.74]
jacob-00182-CANDF	Lung cancer	Adenocarcinoma	Overall Survival	CAN/DF	Shedden	HG-U133A	202206_at	82	0.85	0.001188	0.029429	1.19	0.325053	0.38	1.47 [0.68 - 3.15]
jacob-00182-CANDF	Lung cancer	Adenocarcinoma	Overall Survival	CAN/DF	Shedden	HG-U133A	202208_s_at	82	0.84	0.017014	0.238792	0.89	0.370427	0.22	1.25 [0.77 - 2.04]
jacob-00182-CANDF	Lung cancer	Adenocarcinoma	Overall Survival	CAN/DF	Shedden	HG-U133A	213759_at	82	0.89	0.010387	0.166136	1.04	0.546962	0.12	1.12 [0.77 - 1.63]
HARVARD-LC	Lung cancer	Adenocarcinoma	Overall Survival	Harvard	Beer	HG-U95A	39829_at	84	0.63	0.034294	0.387122	0.6	0.109196	0.4	1.49 [0.91 - 2.42]
jacob-00182-HLM	Lung cancer	Adenocarcinoma	Overall Survival	HLM	Shedden	HG-U133A	202206_at	79	0.1	0.13704	-	0.75	0.685418	0.1	1.11 [0.68 - 1.81]
jacob-00182-HLM	Lung cancer	Adenocarcinoma	Overall Survival	HLM	Shedden	HG-U133A	202208_s_at	79	0.14	0.076563	-	-0.61	0.625843	-0.09	0.91 [0.62 - 1.33]
jacob-00182-MSK	Lung cancer	Adenocarcinoma	Overall Survival	MSK	Shedden	HG-U133A	202206_at	104	0.13	0.063005	-	1.27	0.469574	0.25	1.28 [0.65 - 2.53]
jacob-00182-MSK	Lung cancer	Adenocarcinoma	Overall Survival	MSK	Shedden	HG-U133A	202208_s_at	104	0.74	0.121584	-	0.52	0.567778	0.15	1.17 [0.69 - 1.98]
GSE13213	Lung cancer	Adenocarcinoma	Overall Survival	Nagoya (1995-1999, 2002-2004)	Tomida	G4112F	A_23_P317620	117	0.24	0.006742	0.119504	-0.79	0.416722	-0.13	0.88 [0.64 - 1.20]
GSE31210	Lung cancer	Adenocarcinoma	Overall Survival	NCCRI	Okayama	HG-U133_Plus_2	202206_at	204	0.72	1e-06	7.8e-05	1.64	9e-05	1.36	3.91 [1.98 - 7.75]
GSE31210	Lung cancer	Adenocarcinoma	Relapse Free Survival	NCCRI	Okayama	HG-U133_Plus_2	202206_at	204	0.64	0	0	1.61	2e-06	1.27	3.55 [2.11 - 5.97]
GSE31210	Lung cancer	Adenocarcinoma	Overall Survival	NCCRI	Okayama	HG-U133_Plus_2	202208_s_at	204	0.72	3e-06	0.00016	1.58	8.3e-05	1.27	3.55 [1.89 - 6.66]
GSE31210	Lung cancer	Adenocarcinoma	Relapse Free Survival	NCCRI	Okayama	HG-U133_Plus_2	202208_s_at	204	0.72	0	0	1.51	2e-06	1.2	3.32 [2.02 - 5.45]
GSE31210	Lung cancer	Adenocarcinoma	Overall Survival	NCCRI	Okayama	HG-U133_Plus_2	213759_at	204	0.3	0.005372	0.100136	-0.98	0.048489	-0.39	0.67 [0.46 - 1.00]
GSE31210	Lung cancer	Adenocarcinoma	Relapse Free Survival	NCCRI	Okayama	HG-U133_Plus_2	213759_at	204	0.3	0.00319	0.066177	-0.79	0.031923	-0.32	0.73 [0.54 - 0.97]
jacob-00182-UM	Lung cancer	Adenocarcinoma	Overall Survival	UM	Shedden	HG-U133A	202206_at	178	0.74	0.185261	-	-0.31	0.579094	-0.11	0.90 [0.61 - 1.32]
jacob-00182-UM	Lung cancer	Adenocarcinoma	Overall Survival	UM	Shedden	HG-U133A	202208_s_at	178	0.11	0.05757	-	-0.51	0.317066	-0.14	0.87 [0.66 - 1.15]
GSE11117	Lung cancer	NSCLC	Overall Survival	Basel (2002-2005)	Baty	Novachip human 34.5k	H200011761	41	0.32	0.11685	-	-0.66	0.672256	-0.07	0.94 [0.69 - 1.27]
GSE3141	Lung cancer	NSCLC	Overall Survival	Duke	Bild	HG-U133_Plus_2	202206_at	111	0.86	0.046943	0.472946	-0.99	0.255676	-0.27	0.76 [0.47 - 1.22]
GSE3141	Lung cancer	NSCLC	Overall Survival	Duke	Bild	HG-U133_Plus_2	202208_s_at	111	0.19	0.160114	-	0.53	0.792188	0.07	1.08 [0.62 - 1.86]
GSE3141	Lung cancer	NSCLC	Overall Survival	Duke	Bild	HG-U133_Plus_2	213759_at	111	0.36	0.244839	-	0.33	0.969237	-0.01	0.99 [0.74 - 1.33]
GSE14814	Lung cancer	NSCLC	Overall Survival	JRB.10	Zhu	HG-U133A	202206_at	90	0.78	0.099796	-	-0.72	0.774651	-0.07	0.93 [0.58 - 1.50]
GSE14814	Lung cancer	NSCLC	Disease Specific Survival	JRB.10	Zhu	HG-U133A	202206_at	90	0.78	0.124486	-	-0.81	0.857738	-0.05	0.95 [0.55 - 1.65]
GSE14814	Lung cancer	NSCLC	Overall Survival	JRB.10	Zhu	HG-U133A	202208_s_at	90	0.28	0.003113	0.064891	-0.93	0.219589	-0.33	0.72 [0.42 - 1.22]
GSE14814	Lung cancer	NSCLC	Disease Specific Survival	JRB.10	Zhu	HG-U133A	202208_s_at	90	0.36	0.006544	0.116776	-0.98	0.127111	-0.48	0.62 [0.33 - 1.15]
GSE14814	Lung cancer	NSCLC	Overall Survival	JRB.10	Zhu	HG-U133A	213759_at	90	0.2	0.085877	-	-0.61	0.889563	-0.1	0.91 [0.23 - 3.52]
GSE14814	Lung cancer	NSCLC	Disease Specific Survival	JRB.10	Zhu	HG-U133A	213759_at	90	0.7	0.232109	-	0.46	0.636523	0.37	1.44 [0.32 - 6.59]
GSE4716-GPL3696	Lung cancer	NSCLC	Overall Survival	Nagoya (1995-1996)	Tomida	GF201	2142	50	0.78	0.210363	-	-0.91	0.906015	0.06	1.06 [0.41 - 2.76]
GSE8894	Lung cancer	NSCLC	Relapse Free Survival	Seoul (1995-2005)	Lee	HG-U133_Plus_2	202206_at	138	0.62	0.02038	0.271529	0.56	0.12127	0.17	1.18 [0.96 - 1.47]
GSE8894	Lung cancer	NSCLC	Relapse Free Survival	Seoul (1995-2005)	Lee	HG-U133_Plus_2	202208_s_at	138	0.3	0.152388	-	0.41	0.444867	0.09	1.10 [0.86 - 1.40]
GSE8894	Lung cancer	NSCLC	Relapse Free Survival	Seoul (1995-2005)	Lee	HG-U133_Plus_2	213759_at	138	0.16	0.078608	-	-0.51	0.724887	-0.76	0.47 [0.01 - 32.35]
GSE4573	Lung cancer	Squamous cell carcinoma	Overall Survival	Michigan (1991-2002)	Raponi	HG-U133A	202206_at	129	0.75	0.014905	0.217002	-0.76	0.138082	-0.44	0.65 [0.36 - 1.15]
GSE4573	Lung cancer	Squamous cell carcinoma	Overall Survival	Michigan (1991-2002)	Raponi	HG-U133A	202208_s_at	129	0.58	0.054329	-	-0.49	0.163421	-0.36	0.70 [0.42 - 1.16]
GSE4573	Lung cancer	Squamous cell carcinoma	Overall Survival	Michigan (1991-2002)	Raponi	HG-U133A	213759_at	129	0.38	0.041774	0.439645	0.56	0.226555	0.21	1.24 [0.88 - 1.75]
GSE17710	Lung cancer	Squamous cell carcinoma	Relapse Free Survival	UNC	Wilkerson	Agilent-UNC-custom-4X44K	10067	56	0.89	0.014291	0.210445	1.15	0.889797	0.04	1.04 [0.57 - 1.90]
GSE17710	Lung cancer	Squamous cell carcinoma	Overall Survival	UNC	Wilkerson	Agilent-UNC-custom-4X44K	10067	56	0.89	0.004409	0.085698	1.32	0.532548	0.19	1.21 [0.66 - 2.22]
GSE17710	Lung cancer	Squamous cell carcinoma	Relapse Free Survival	UNC	Wilkerson	Agilent-UNC-custom-4X44K	40378	56	0.89	0.003254	0.067246	1.26	0.632472	-0.15	0.87 [0.48 - 1.57]
GSE17710	Lung cancer	Squamous cell carcinoma	Overall Survival	UNC	Wilkerson	Agilent-UNC-custom-4X44K	40378	56	0.89	0.000744	0.019875	1.44	0.970285	0.01	1.01 [0.56 - 1.83]
GSE17710	Lung cancer	Squamous cell carcinoma	Relapse Free Survival	UNC	Wilkerson	Agilent-UNC-custom-4X44K	43130	56	0.88	0.006867	0.121213	1.18	0.903985	0.03	1.03 [0.62 - 1.71]
GSE17710	Lung cancer	Squamous cell carcinoma	Overall Survival	UNC	Wilkerson	Agilent-UNC-custom-4X44K	43130	56	0.88	0.001078	0.027141	1.42	0.52212	0.17	1.18 [0.71 - 1.98]
GSE9891	Ovarian cancer		Overall Survival	AOCS, RBH, WH, NKI-AVL (1992-2006)	Tothill	HG-U133_Plus_2	202206_at	278	0.24	0.063071	-	0.45	0.058831	0.19	1.21 [0.99 - 1.48]
GSE9891	Ovarian cancer		Overall Survival	AOCS, RBH, WH, NKI-AVL (1992-2006)	Tothill	HG-U133_Plus_2	202208_s_at	278	0.22	0.00111	0.027803	0.9	0.018547	0.29	1.34 [1.05 - 1.71]
GSE9891	Ovarian cancer		Overall Survival	AOCS, RBH, WH, NKI-AVL (1992-2006)	Tothill	HG-U133_Plus_2	213759_at	278	0.9	0.023277	0.297967	-1	0.637097	-0.22	0.80 [0.32 - 2.01]
DUKE-OC	Ovarian cancer		Overall Survival	Duke	Bild	HG-U133A	202206_at	133	0.33	0.001941	0.044198	0.86	0.008428	0.2	1.22 [1.05 - 1.41]
DUKE-OC	Ovarian cancer		Overall Survival	Duke	Bild	HG-U133A	202208_s_at	133	0.5	1e-05	0.000461	1.05	2.8e-05	0.38	1.46 [1.23 - 1.75]
DUKE-OC	Ovarian cancer		Overall Survival	Duke	Bild	HG-U133A	213759_at	133	0.7	0.003789	0.075973	0.71	0.022648	2.88	17.88 [1.50 - 213.45]
GSE8841	Ovarian cancer		Overall Survival	Milan (1992-2003)	Marchini	G4100A	1799	81	0.37	0.076557	-	-0.89	0.354538	-0.19	0.83 [0.55 - 1.24]
GSE26712	Ovarian cancer		Overall Survival	MSKCC (1990-2003)	Bonome	HG-U133_Plus_2	202206_at	185	0.64	0.163704	-	-0.26	0.309463	-0.1	0.91 [0.76 - 1.09]
GSE26712	Ovarian cancer		Disease Free Survival	MSKCC (1990-2003)	Bonome	HG-U133_Plus_2	202206_at	185	0.29	0.224535	-	0.22	0.587993	-0.05	0.96 [0.81 - 1.13]
GSE26712	Ovarian cancer		Overall Survival	MSKCC (1990-2003)	Bonome	HG-U133_Plus_2	202208_s_at	185	0.3	0.022263	0.288878	-0.43	0.113286	-0.15	0.86 [0.71 - 1.04]
GSE26712	Ovarian cancer		Disease Free Survival	MSKCC (1990-2003)	Bonome	HG-U133_Plus_2	202208_s_at	185	0.15	0.025743	0.319375	-0.47	0.137414	-0.13	0.88 [0.74 - 1.04]
GSE26712	Ovarian cancer		Overall Survival	MSKCC (1990-2003)	Bonome	HG-U133_Plus_2	213759_at	185	0.88	0.019803	0.266074	-0.75	0.39285	-0.31	0.73 [0.36 - 1.49]
GSE26712	Ovarian cancer		Disease Free Survival	MSKCC (1990-2003)	Bonome	HG-U133_Plus_2	213759_at	185	0.88	0.020954	0.276888	-0.65	0.457753	-0.24	0.79 [0.42 - 1.48]
GSE17260	Ovarian cancer		Progression Free Survival	Niigata (1997-2008)	Yoshihara	G4112A	A_23_P317620	110	0.54	0.021736	0.284085	-0.54	0.507301	-0.07	0.94 [0.77 - 1.14]
GSE17260	Ovarian cancer		Overall Survival	Niigata (1997-2008)	Yoshihara	G4112A	A_23_P317620	110	0.69	0.134487	-	-0.49	0.891918	0.02	1.02 [0.79 - 1.31]
GSE14764	Ovarian cancer		Overall Survival	TOC	Denkert	HG-U133A	202206_at	80	0.11	0.27016	-	1.08	0.694645	0.09	1.09 [0.71 - 1.66]
GSE14764	Ovarian cancer		Overall Survival	TOC	Denkert	HG-U133A	202208_s_at	80	0.19	0.045425	0.463396	1.8	0.32173	0.2	1.23 [0.82 - 1.83]
GSE14764	Ovarian cancer		Overall Survival	TOC	Denkert	HG-U133A	213759_at	80	0.57	0.058184	-	-0.9	0.114546	-0.4	0.67 [0.40 - 1.10]
GSE16560	Prostate cancer		Overall Survival	Sweden (1977-1999)	Sboner	6K DASL	DAP2_6007	281	0.89	0.008538	0.143255	-0.67	0.546256	-0.05	0.95 [0.82 - 1.11]
E-DKFZ-1	Renal cell carcinoma		Overall Survival	RZPD	Sueltmann	A-RZPD-20	rzpd.de:huber1:Reporter:IMAGE:112116	59	0.9	0.071445	-	1	0.237937	0.79	2.21 [0.59 - 8.21]
GSE19234	Skin cancer	Melanoma	Overall Survival	NYU	Bogunovic	HG-U133_Plus_2	202206_at	38	0.11	0.201769	-	1.24	0.76648	0.07	1.07 [0.69 - 1.67]
GSE19234	Skin cancer	Melanoma	Overall Survival	NYU	Bogunovic	HG-U133_Plus_2	202208_s_at	38	0.71	0.107196	-	-0.98	0.949245	-0.01	0.99 [0.68 - 1.44]
GSE19234	Skin cancer	Melanoma	Overall Survival	NYU	Bogunovic	HG-U133_Plus_2	213759_at	38	0.24	0.003538	0.071915	-1.48	0.09026	-0.86	0.42 [0.16 - 1.14]
GSE30929	Soft tissue cancer	Liposarcoma	Distant Recurrence Free Survival	MSKCC (1993-2008)	Gobble	HG-U133A	202206_at	140	0.61	0.010924	0.172527	0.72	0.052392	0.26	1.29 [1.00 - 1.67]
GSE30929	Soft tissue cancer	Liposarcoma	Distant Recurrence Free Survival	MSKCC (1993-2008)	Gobble	HG-U133A	202208_s_at	140	0.41	0.00086	0.022457	1.07	0.007412	0.44	1.56 [1.13 - 2.15]
GSE30929	Soft tissue cancer	Liposarcoma	Distant Recurrence Free Survival	MSKCC (1993-2008)	Gobble	HG-U133A	213759_at	140	0.24	0.006133	0.111039	1.33	0.614145	0.44	1.55 [0.28 - 8.43]
